# Supplementary material for: SnO deposition via water based ALD employing tin(ii) formamidinate: precursor characterization and process development
Source: Royal Society of Chemistry journal article supplement (doi:10.1039/d2dt02562k), 2022-01-01
Supplement: d2dt02562k1.pdf [file d2dt02562k1.pdf]

SnO *via* Water-Based ALD employing Tin(II) Formamidinate: Precursor  
Characterization and Process Development

Niklas Huster<sup>#</sup>, Ramin Ghiyasi<sup>#</sup>, David Zanders, Detlef Rogalla, Maarit  
Karppinen\*, Anjana Devi\*

Supplementary Information

# $^1\text{H}$ and $^{13}\text{C}$ NMR

## Bis(diisopropylformamidinato) tin(II) ( $[\text{Sn}(\text{iPr}_2\text{fAMD})_2]$ ), **1**

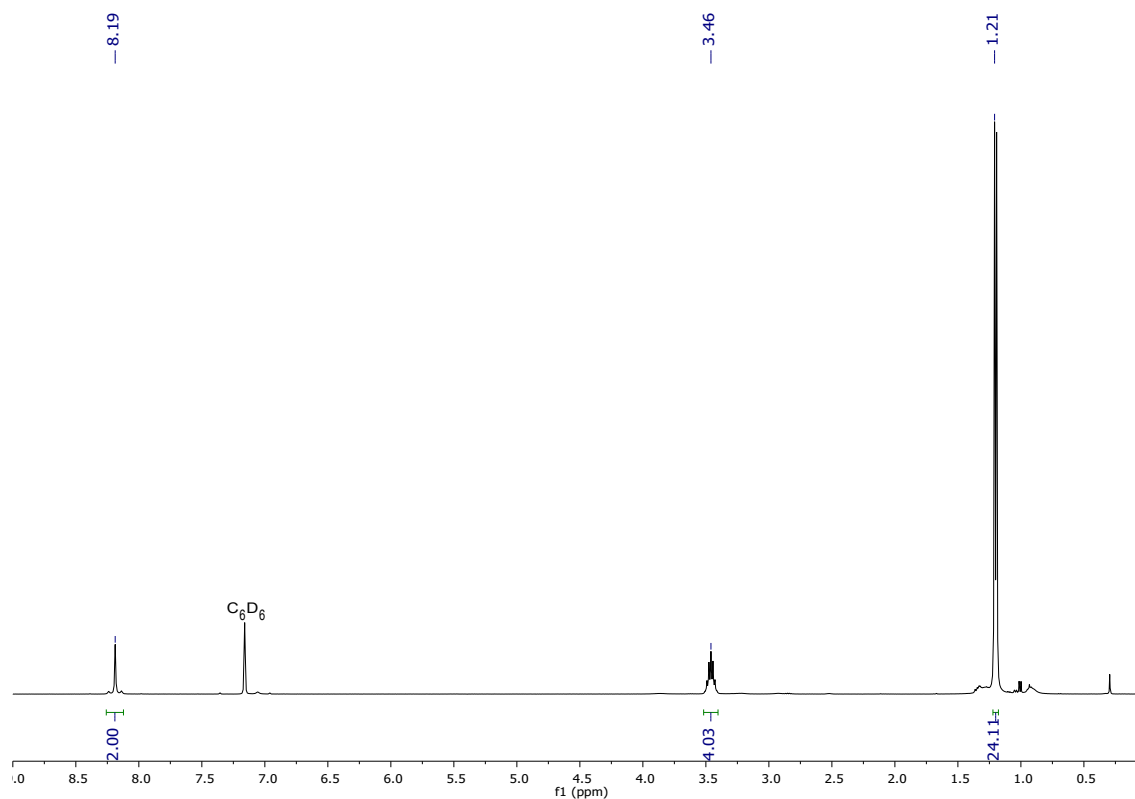

Figure S 1:  $^1\text{H}$  NMR of compound **1**.

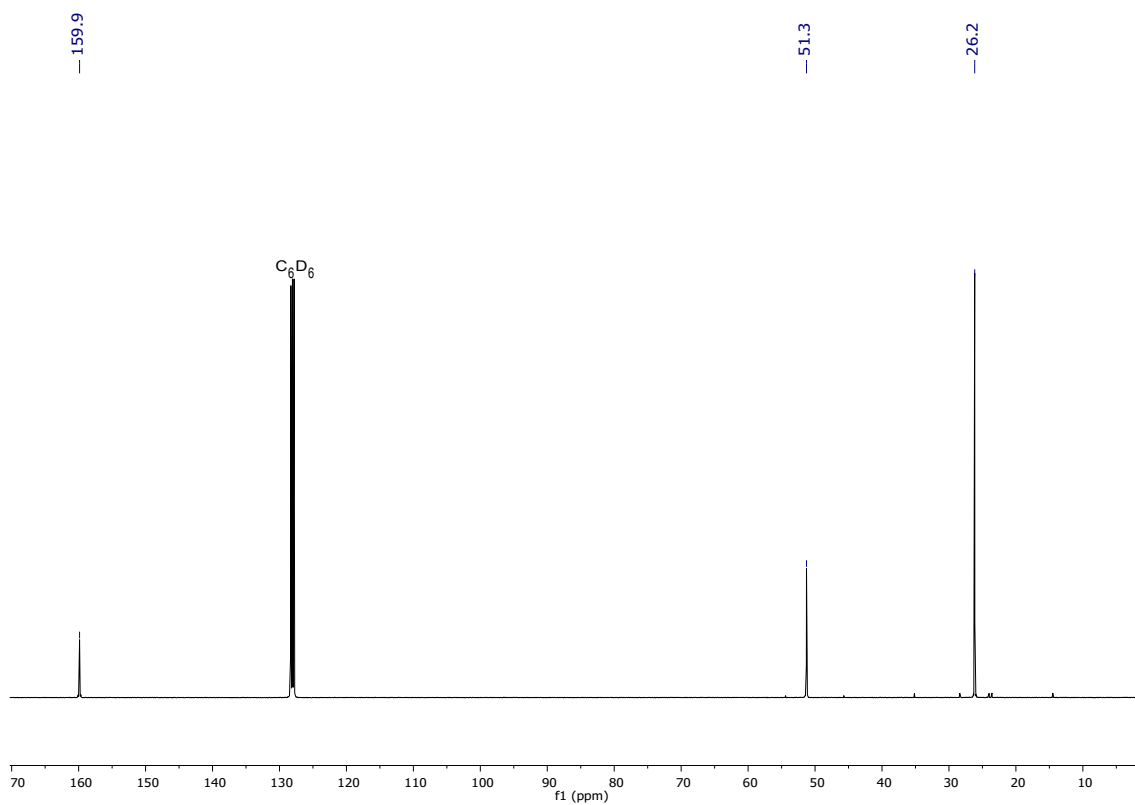

Figure S 2:  $^{13}\text{C}$  NMR of compound **1**.

**Bis(diisopropylacetamidinato) tin(II) ([Sn(iPr<sub>2</sub>AMD)<sub>2</sub>], 3**

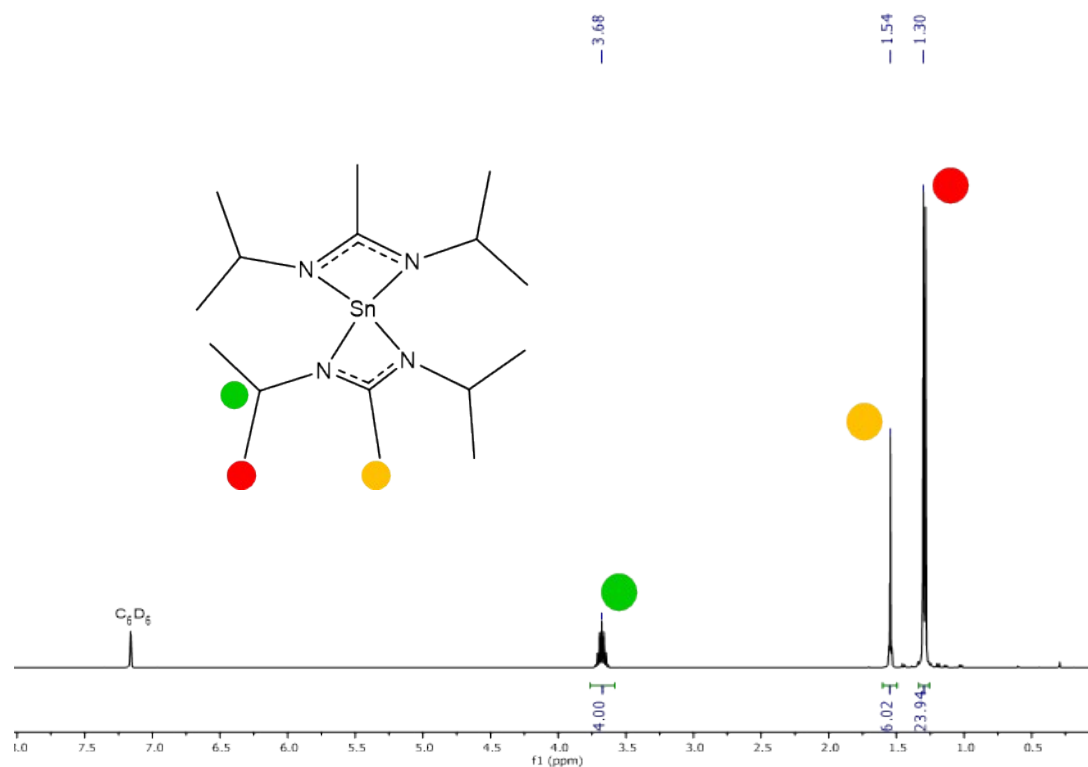

Figure S 3: <sup>1</sup>H NMR of compound 3.

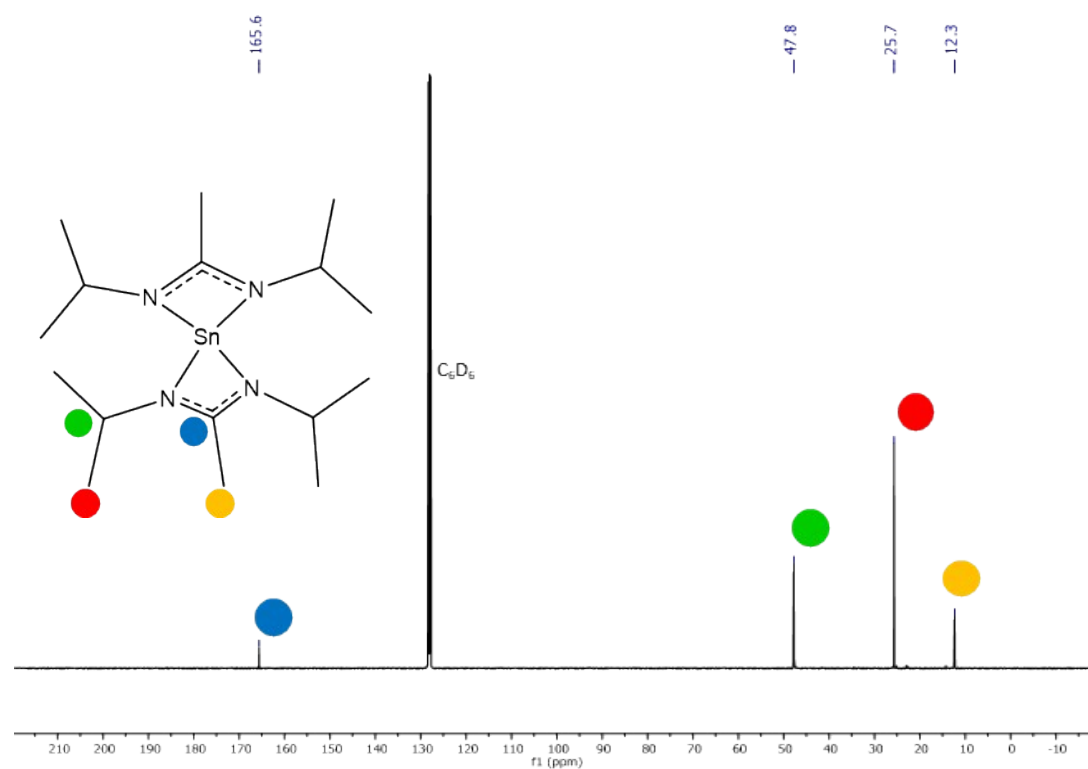

Figure S 4: <sup>13</sup>C NMR of compound 3.

**Bis(ethyl-*tert*-butyl-acetamidinato) tin(II) ([Sn(Et<sup>t</sup>BuAMD)<sub>2</sub>]), 4**

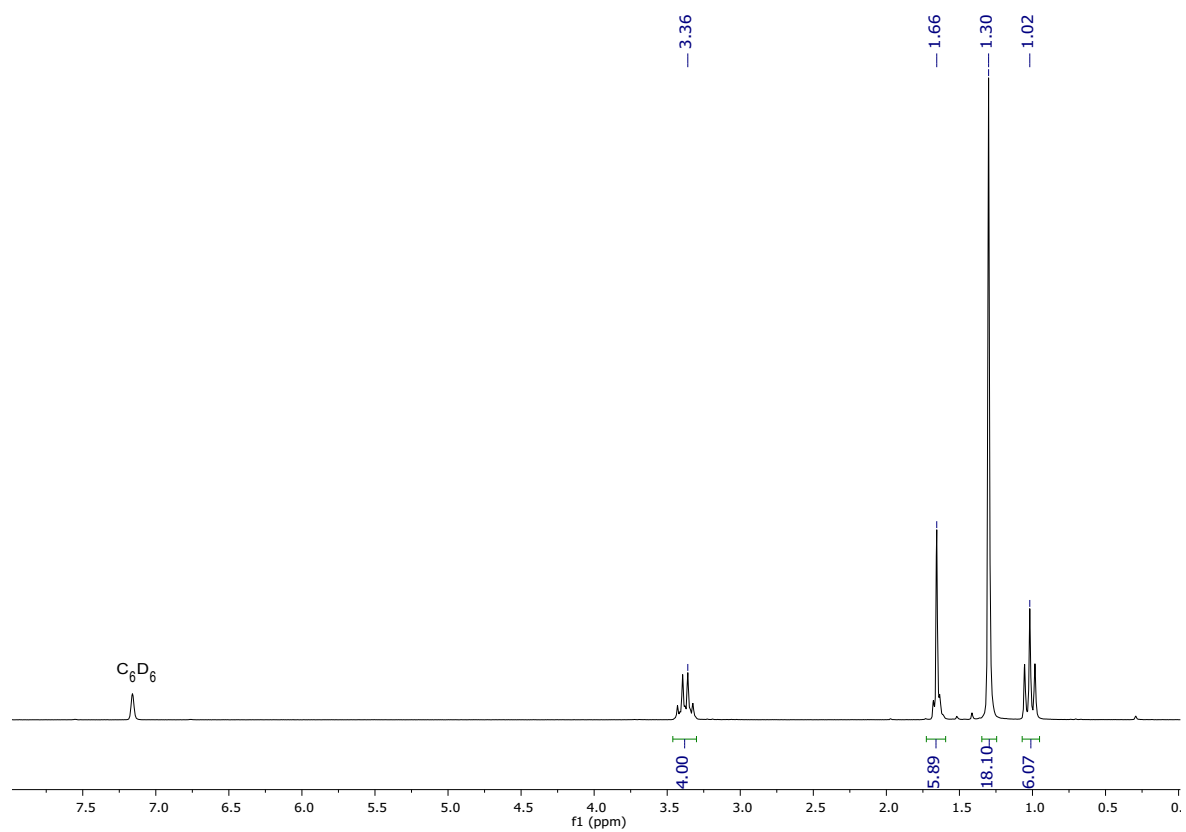

Figure S 5: <sup>1</sup>H NMR of compound 4.

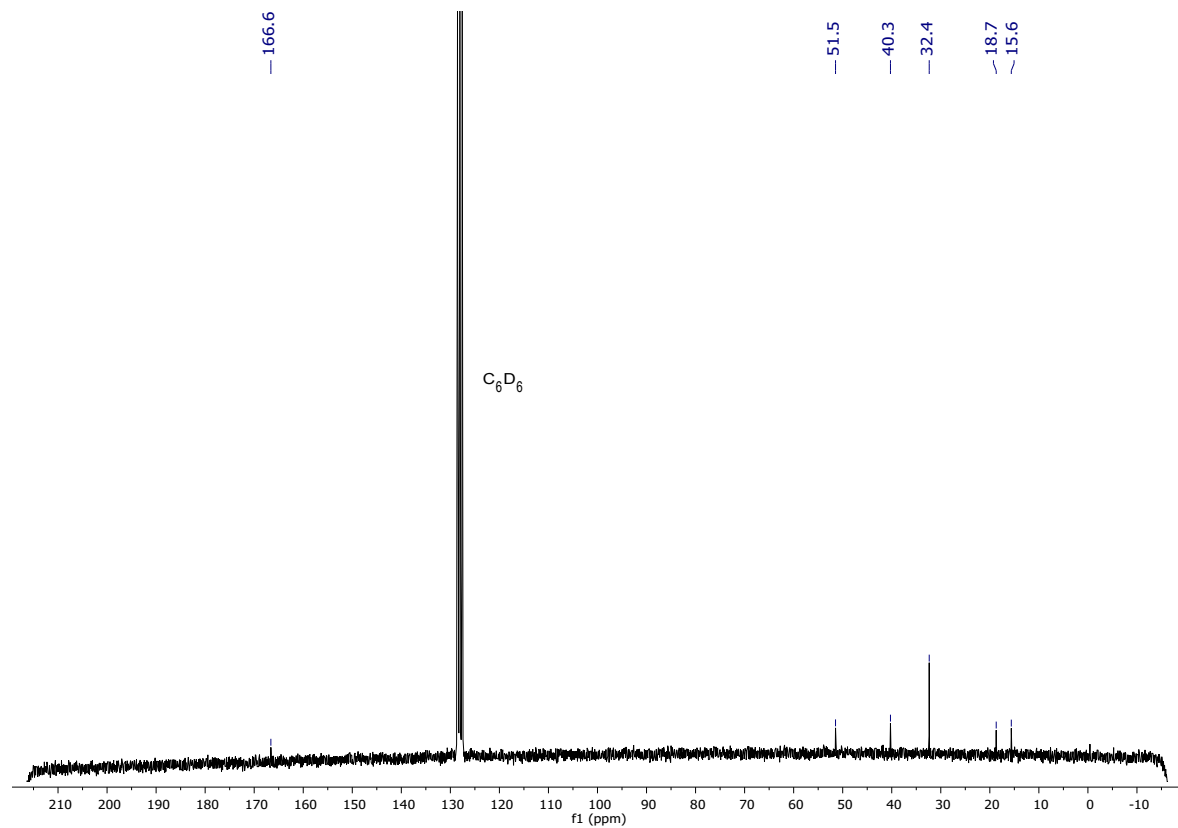

Figure S 6: <sup>13</sup>C NMR of compound 4.

## ALD Sequence, GI-XRD, and XPS

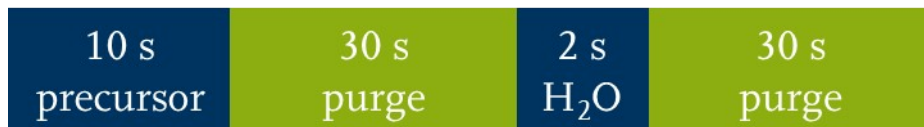

Figure S 7 Pulse and purge times of the ALD process schematically displayed.

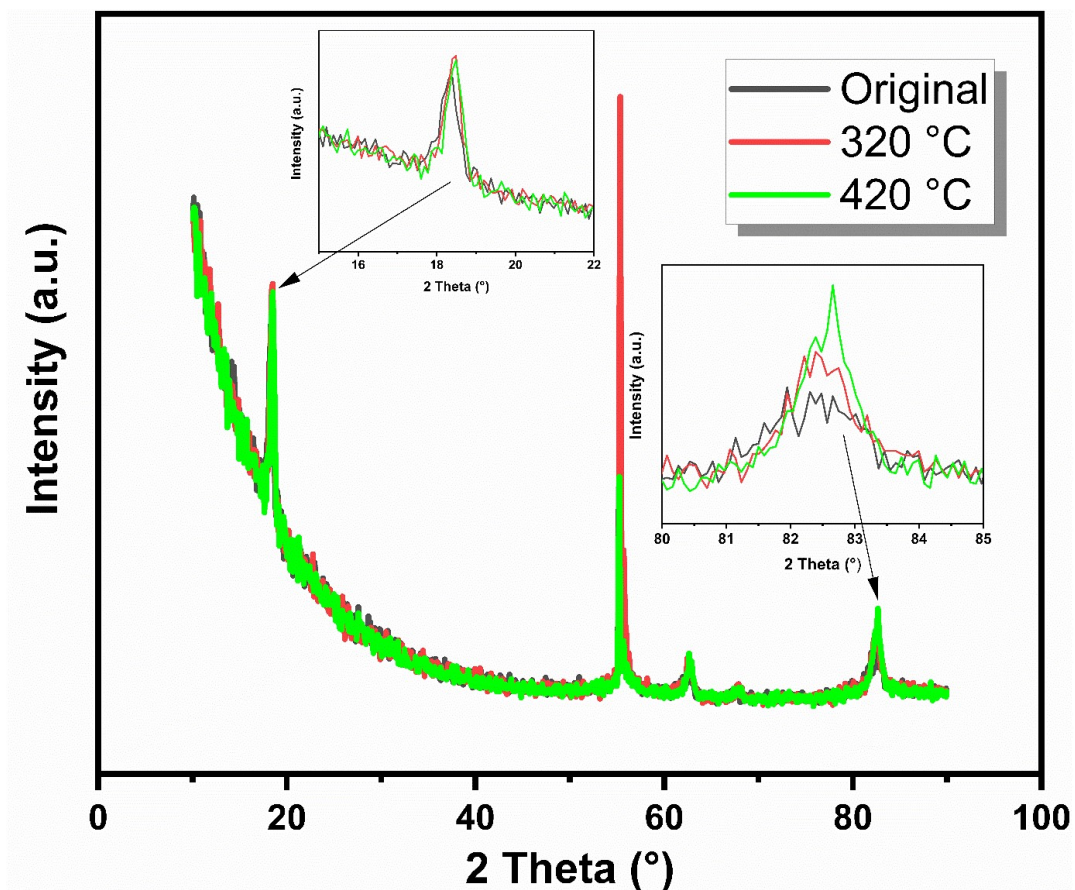

Figure S 8 GI-XRD patterns for an as deposited (at 220 °C) SnO thin film and for the same film after annealing at 320 or 420 °C. The two peaks indicated by the arrows and enlarged in the insets are the (001) and (213) reflections of the SnO phase.

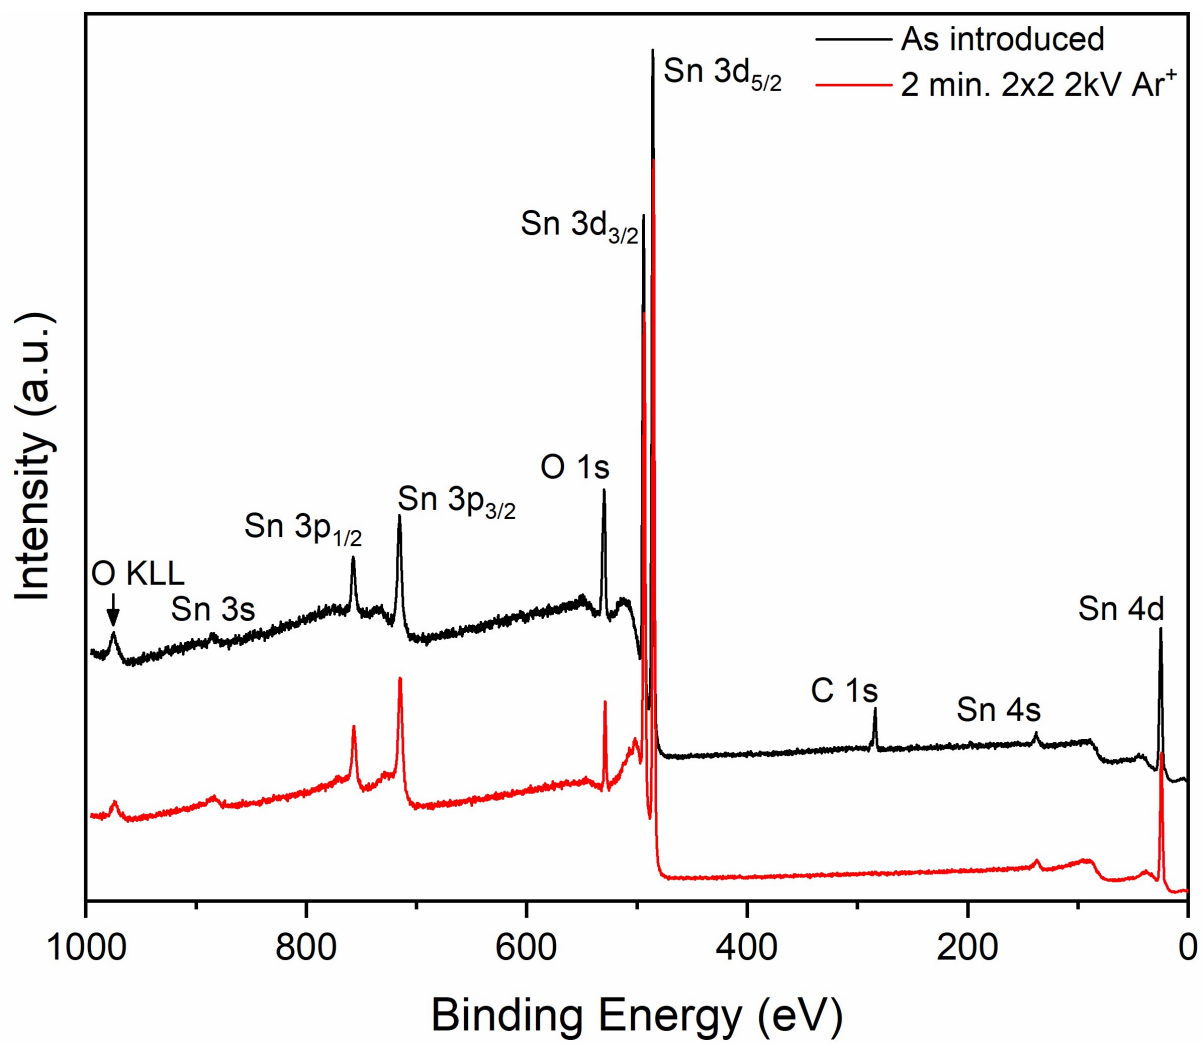

Figure S 9 XPS survey spectra of a SnO thin film deposited on Si(100) at 180 °C.
